# Supplementary material for: Central Glucagon-like Peptide-1 Receptor Signaling via Brainstem Catecholamine Neurons Counteracts Hypertension in Spontaneously Hypertensive Rats
Source: PubMed Central journal article supplement (PMC6753091; doi:10.1038/s41598-019-49364-x), 2019-09-19
Supplement: 41598_2019_49364_MOESM1_ESM.pdf [file 41598_2019_49364_MOESM1_ESM.pdf]

## Supplementary information

### **Central Glucagon-like Peptide-1 Receptor Signaling via Brainstem Catecholamine Neurons Counteracts Hypertension in Spontaneously Hypertensive Rats**

Kenichi Katsurada<sup>1,2,5</sup>, Masanori Nakata<sup>1,3</sup>, Toshinobu Saito<sup>1,2</sup>, Boyang Zhang<sup>1</sup>, Yuko Maejima<sup>4</sup>, Shyam S. Nandi<sup>5</sup>, Neeru M. Sharma<sup>5</sup>, Kaushik P. Patel<sup>5</sup>, Kazuomi Kario<sup>2</sup>, Toshihiko Yada<sup>1,6,7</sup> \*

<sup>1</sup>Division of Integrative Physiology, Department of Physiology

<sup>2</sup>Division of Cardiovascular Medicine, Department of Internal Medicine

Jichi Medical University School of Medicine, Shimotsuke, Tochigi 329-0498, Japan

<sup>3</sup>Department of Physiology, Wakayama Medical University School of Medicine, Wakayama 641-8509, Japan

<sup>4</sup>Department of Pharmacology, Fukushima Medical University School of Medicine, Fukushima 960-1295, Japan

<sup>5</sup>Department of Cellular and Integrative Physiology, University of Nebraska Medical Center, Omaha, NE 68198-5850

<sup>6</sup>Center for Integrative Physiology, Kansai Electric Power Medical Research Institute, 1-5-6 Minatojimaminamimachi, Chuou-ku, Kobe 650-0047, Japan

<sup>7</sup>Division of System Neuroscience, Kobe University Graduate School of Medicine, Kobe 650-0017, Japan

\*Correspondence: tyada@jichi.ac.jp

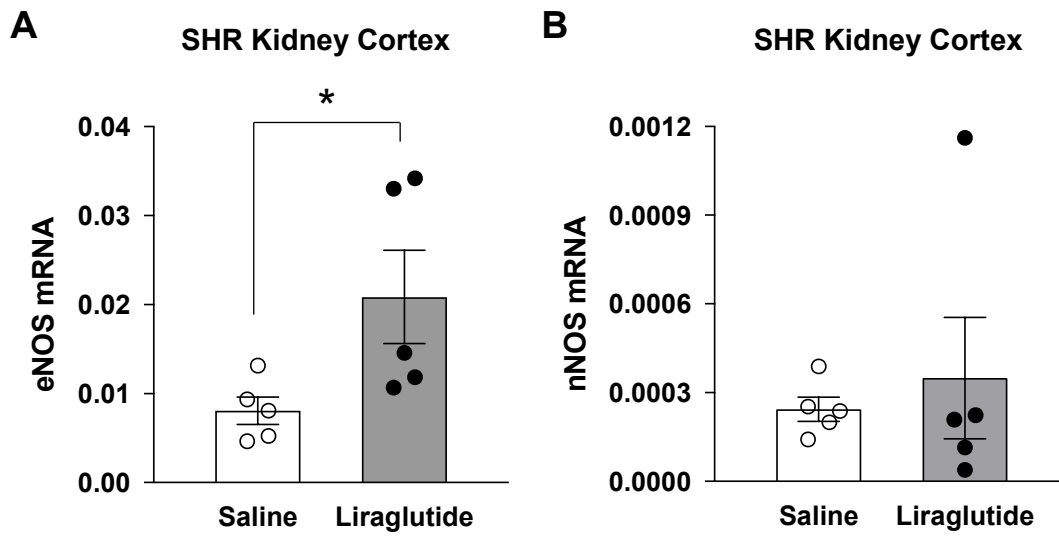

**Supplementary Figure S1. Repeated LV injection of liraglutide increases eNOS but not nNOS mRNA expression in kidney cortex of SHR**

eNOS (A) and nNOS (B) mRNA expression in the kidney cortex of SHR after repeated LV injection of saline or liraglutide for 2 weeks (n = 5). Each bar represents mean ± SE. \* $P < 0.05$  between liraglutide and saline.
